# Supplementary material
Source: PubMed Central journal article supplement (PMC10312204)
Supplement: NIHMS1910759-supplement-1.pdf [file NIHMS1910759-supplement-1.pdf]

## Supplemental Material

|                                                                | Age 5-39          | Age 40-49         | Age 50-59         | Age 60+           |
|----------------------------------------------------------------|-------------------|-------------------|-------------------|-------------------|
| All counselees (N = 784)                                       |                   |                   |                   |                   |
| Model Performance                                              |                   |                   |                   |                   |
| Leiden                                                         | 0.66 (0.57, 0.75) | 0.84 (0.77, 0.90) | 0.80 (0.70, 0.88) | 0.65 (0.49, 0.77) |
| MMRpro                                                         | 0.72 (0.64, 0.79) | 0.85 (0.78, 0.91) | 0.75 (0.63, 0.85) | 0.66 (0.53, 0.77) |
| MMRpro+                                                        | 0.76 (0.69, 0.83) | 0.88 (0.83, 0.93) | 0.79 (0.68, 0.88) | 0.67 (0.55, 0.78) |
| PREMM <sub>5</sub>                                             | 0.73 (0.65, 0.80) | 0.85 (0.78, 0.91) | 0.79 (0.68, 0.89) | 0.65 (0.53, 0.77) |
| Improvement Frequency Across Bootstrap Replicates <sup>a</sup> |                   |                   |                   |                   |
| MMRpro > MMRpro+                                               | 0.011             | 0.020             | 0.075             | 0.331             |
| MMRpro > PREMM <sub>5</sub>                                    | 0.511             | 0.609             | 0.165             | 0.592             |
| MMRpro > Leiden                                                | 0.965             | 0.709             | 0.197             | 0.569             |
| MMRpro+ > PREMM <sub>5</sub>                                   | 0.873             | 0.943             | 0.531             | 0.668             |
| MMRpro+ > Leiden                                               | 0.993             | 0.931             | 0.459             | 0.631             |
| PREMM <sub>5</sub> > Leiden                                    | 0.952             | 0.614             | 0.421             | 0.478             |
| CRC Affected counselees (N = 413)                              |                   |                   |                   |                   |
| Model Performance                                              |                   |                   |                   |                   |
| Leiden                                                         | 0.65 (0.56, 0.74) | 0.82 (0.74, 0.90) | 0.75 (0.59, 0.89) | 0.56 (0.29, 0.82) |
| MMRpredict                                                     | 0.70 (0.62, 0.78) | 0.79 (0.69, 0.87) | 0.71 (0.51, 0.88) | 0.55 (0.27, 0.80) |
| MMRpro                                                         | 0.73 (0.64, 0.80) | 0.83 (0.73, 0.92) | 0.68 (0.47, 0.86) | 0.56 (0.27, 0.82) |
| MMRpro+                                                        | 0.76 (0.68, 0.84) | 0.86 (0.79, 0.93) | 0.79 (0.62, 0.93) | 0.62 (0.39, 0.84) |
| PREMM <sub>5</sub>                                             | 0.72 (0.62, 0.80) | 0.85 (0.77, 0.93) | 0.70 (0.47, 0.88) | 0.55 (0.29, 0.81) |
| Improvement Frequency Across Bootstrap Replicates <sup>a</sup> |                   |                   |                   |                   |
| MMRpro > MMRpro+                                               | 0.056             | 0.014             | 0.015             | 0.062             |
| MMRpro > PREMM <sub>5</sub>                                    | 0.748             | 0.135             | 0.336             | 0.633             |
| MMRpro > Leiden                                                | 0.990             | 0.482             | 0.130             | 0.598             |
| MMRpro > MMRpredict                                            | 0.816             | 0.838             | 0.334             | 0.650             |
| MMRpro+ > PREMM <sub>5</sub>                                   | 0.936             | 0.708             | 0.927             | 0.828             |
| MMRpro+ > Leiden                                               | 0.995             | 0.837             | 0.709             | 0.796             |
| MMRpro+ > MMRpredict                                           | 0.943             | 0.991             | 0.869             | 0.926             |
| PREMM <sub>5</sub> > Leiden                                    | 0.943             | 0.730             | 0.170             | 0.442             |
| PREMM <sub>5</sub> > MMRpredict                                | 0.638             | 0.965             | 0.378             | 0.480             |
| Leiden > MMRpredict                                            | 0.085             | 0.796             | 0.743             | 0.500             |

Table S1. C-statistics stratified by age interval for all counselees and affected counselees.

<sup>a</sup>Improvement frequency is defined as the proportion of replicates for which model 1 had a higher c-statistic than model 2 across 1000 bootstrap replicates.

|                                                     | CU         | JHU        | MDA         | MSKCC       | DFCI        | CCFR         | All Centers  |
|-----------------------------------------------------|------------|------------|-------------|-------------|-------------|--------------|--------------|
| Total counselees                                    | 55 (100)   | 59 (100)   | 143 (100)   | 201 (100)   | 326 (100)   | 2729 (100)   | 3513 (100)   |
| Male counselees                                     | 24 (43.64) | 24 (40.68) | 69 (48.25)  | 74 (36.82)  | 89 (27.3)   | 1298 (47.56) | 1578 (44.92) |
| counselees with CRC                                 | 29 (52.73) | 42 (71.19) | 131 (91.61) | 104 (51.74) | 107 (32.82) | 2509 (91.94) | 2922 (83.18) |
| Male counselees with CRC                            | 15 (27.27) | 15 (25.42) | 65 (45.45)  | 49 (24.38)  | 48 (14.72)  | 1234 (45.22) | 1426 (40.59) |
| Female counselees with CRC                          | 14 (25.45) | 27 (45.76) | 66 (46.15)  | 55 (27.36)  | 59 (18.1)   | 1275 (46.72) | 1496 (42.58) |
| Female counselees with EC                           | 7 (12.73)  | 2 (3.39)   | 5 (3.5)     | 25 (12.44)  | 68 (20.86)  | 72 (2.64)    | 179 (5.10)   |
| Counselees with no cancer                           | 21 (38.18) | 17 (28.81) | 8 (5.59)    | 57 (28.36)  | 102 (31.29) | 135 (4.95)   | 340 (9.68)   |
| Counselees with an extra-colonic cancer $\vartheta$ | 9 (16.36)  | 0 (0)      | 22 (15.38)  | 27 (13.43)  | 64 (19.63)  | 0 (0)        | 122 (3.47)   |
| Counselees with multiple primary cancers $\psi$     | 17 (30.91) | 1 (1.69)   | 77 (53.85)  | 34 (16.92)  | 64 (19.63)  | 633 (23.2)   | 826 (23.51)  |
| Counselees with a previous adenoma(s) $\xi$         | 14 (25.45) | 2 (3.39)   | 0 (0)       | 79 (39.3)   | 149 (45.71) | 0 (0)        | 244 (6.95)   |
| Number of known proximal tumors                     | 9 (16.36)  | 15 (25.42) | 15 (10.49)  | 0 (0)       | 0 (0)       | 0 (0)        | 39 (1.11)    |
| Number of known distal tumors                       | 8 (14.55)  | 14 (23.73) | 24 (16.78)  | 0 (0)       | 0 (0)       | 0 (0)        | 46 (1.31)    |
| Number of tumors with unknown location              | 12 (21.82) | 13 (22.03) | 92 (64.34)  | 104 (51.74) | 107 (32.82) | 2509 (91.94) | 2837 (80.76) |
| MSI+ $\delta$                                       | 0 (0)      | 12 (20.34) | 1 (0.7)     | 48 (23.88)  | 26 (7.98)   | 649 (23.78)  | 736 (20.95)  |
| MSI-, Germline tested                               | 0 (0)      | 0 (0)      | 0 (0)       | 46 (22.89)  | 64 (19.63)  | 831 (30.45)  | 941 (26.79)  |
| MSI-, Not germline tested                           | 0 (0)      | 0 (0)      | 0 (0)       | 0 (0)       | 0 (0)       | 0 (0)        | 0 (0)        |
| Not MSI tested                                      | 55 (100)   | 47 (79.66) | 142 (99.3)  | 107 (53.23) | 236 (72.39) | 1249 (45.77) | 1836 (55.11) |
| MLH1+                                               | 19 (34.55) | 11 (18.64) | 29 (20.28)  | 25 (12.44)  | 15 (4.6)    | 228 (8.35)   | 327 (9.31)   |
| MLH1 tested                                         | 31 (56.36) | 59 (100)   | 109 (76.22) | 157 (78.11) | 311 (95.4)  | 2425 (88.86) | 3092 (88.02) |
| MSH2+                                               | 15 (27.27) | 7 (11.86)  | 39 (27.27)  | 43 (21.39)  | 13 (3.99)   | 274 (10.04)  | 391 (11.13)  |
| MSH2 Tested                                         | 24 (43.64) | 59 (100)   | 103 (72.03) | 194 (96.52) | 312 (95.71) | 2268 (83.11) | 2960 (84.26) |
| MSH6+                                               | 0 (0)      | 0 (0)      | 0 (0)       | 4 (1.99)    | 14 (4.29)   | 83 (3.04)    | 101 (2.88)   |
| MSH6 tested                                         | 0 (0)      | 0 (0)      | 0 (0)       | 11 (5.47)   | 300 (92.02) | 808 (29.61)  | 1119 (31.85) |
| Total positive                                      | 34 (61.82) | 18 (30.51) | 68 (47.55)  | 68 (33.83)  | 42 (12.88)  | 584 (21.4)   | 814 (23.17)  |
| Median family size                                  | 133        | 19         | 19          | 44          | 33          | 33           | 33           |
| Mean age onset CRC                                  | 43.0       | 43.4       | 41.8        | 46.0        | 47.4        | 51.3         | 50.3         |
| Mean age CRC (Males)                                | 42.7       | 41.1       | 40.4        | 46.5        | 47.9        | 50.8         | 49.9         |
| Mean age onset CRC (Females)                        | 43.2       | 44.6       | 43.2        | 45.6        | 47.1        | 51.8         | 50.8         |
| Mean age onset EC (Females)                         | 46.6       | 54.0       | 44.4        | 49.0        | 49.6        | 49.5         | 49.3         |

Table S2. Clinical information of counselees in the additional analysis by center.

N (%) for count data for each participating data center

$\vartheta$  Extra-colonic cancers include those in the Revised Bethesda Guidelines

$\psi$  Includes individuals with colon cancers in different sites and cancers in multiple organs. Recurrences of the same cancer are not included.

$\xi$  Information about previous adenomas and/or colonic polyps was not available for all individuals.

$\delta$  All counselees who were MSI positive were germline tested.

|                                    | C-Statistic      | Observed to<br>Expected Ratio | PPV †            | PPV ‡            | NPV †            | NPV ‡            | Brier Score      |
|------------------------------------|------------------|-------------------------------|------------------|------------------|------------------|------------------|------------------|
| All counselees (N = 3513) §        |                  |                               |                  |                  |                  |                  |                  |
| Model Performance                  |                  |                               |                  |                  |                  |                  |                  |
| Leiden                             | 0.79 (0.78,0.81) | 1.52 (1.44,1.62)              | 0.38 (0.36,0.41) | 0.33 (0.31,0.35) | 0.91 (0.89,0.92) | 0.92 (0.91,0.94) | 0.15 (0.14,0.16) |
| MMRpro                             | 0.82 (0.8,0.84)  | 1.09 (1.03,1.15)              | 0.44 (0.41,0.47) | 0.38 (0.36,0.4)  | 0.91 (0.9,0.92)  | 0.92 (0.91,0.93) | 0.14 (0.13,0.15) |
| MMRpro+                            | 0.85 (0.83,0.86) | 1.02 (0.96,1.06)              | 0.45 (0.43,0.48) | 0.4 (0.37,0.42)  | 0.93 (0.92,0.94) | 0.93 (0.92,0.94) | 0.13 (0.12,0.14) |
| PREMM <sub>5</sub>                 | 0.81 (0.79,0.83) | 2.11 (1.99,2.24)              | 0.47 (0.44,0.5)  | 0.37 (0.35,0.39) | 0.9 (0.89,0.91)  | 0.92 (0.9,0.93)  | 0.15 (0.14,0.16) |
| Improvement Frequency Across       |                  |                               |                  |                  |                  |                  |                  |
| Bootstrap Replicates <sup>a</sup>  |                  |                               |                  |                  |                  |                  |                  |
| MMRpro > MMRpro+                   | 0                | 0.183                         | 0.064            | 0.007            | 0                | 0.001            | 0                |
| MMRpro > PREMM <sub>5</sub>        | 0.996            | 1                             | 0                | 0.997            | 1                | 0.887            | 1                |
| MMRpro > Leiden                    | 1                | 1                             | 1                | 1                | 0.962            | 0.376            | 0.992            |
| MMRpro+ > PREMM <sub>5</sub>       | 1                | 1                             | 0.023            | 1                | 1                | 0.996            | 1                |
| MMRpro+ > Leiden                   | 1                | 1                             | 1                | 1                | 0.999            | 0.871            | 1                |
| PREMM <sub>5</sub> > Leiden        | 0.973            | 0                             | 1                | 1                | 0.125            | 0.085            | 0.016            |
| CRC Affected counselees (N = 2339) |                  |                               |                  |                  |                  |                  |                  |
| Model Performance                  |                  |                               |                  |                  |                  |                  |                  |
| Leiden                             | 0.81 (0.79,0.83) | 1.63 (1.53,1.73)              | 0.4 (0.37,0.42)  | 0.33 (0.31,0.35) | 0.92 (0.9,0.93)  | 0.94 (0.92,0.95) | 0.14 (0.13,0.15) |
| MMRpredict                         | 0.84 (0.82,0.86) | 0.81 (0.76,0.85)              | 0.34 (0.32,0.36) | 0.3 (0.28,0.32)  | 0.95 (0.94,0.97) | 0.96 (0.95,0.97) | 0.14 (0.13,0.14) |
| MMRpro                             | 0.85 (0.83,0.87) | 0.99 (0.94,1.06)              | 0.45 (0.42,0.47) | 0.38 (0.36,0.41) | 0.93 (0.91,0.94) | 0.94 (0.92,0.95) | 0.13 (0.12,0.13) |
| MMRpro+                            | 0.88 (0.87,0.9)  | 0.92 (0.87,0.97)              | 0.46 (0.43,0.49) | 0.4 (0.37,0.42)  | 0.94 (0.93,0.95) | 0.95 (0.94,0.96) | 0.12 (0.11,0.13) |
| PREMM <sub>5</sub>                 | 0.85 (0.83,0.86) | 1.89 (1.77,2)                 | 0.48 (0.45,0.51) | 0.36 (0.34,0.39) | 0.93 (0.91,0.94) | 0.94 (0.93,0.95) | 0.14 (0.13,0.15) |
| Improvement Frequency Across       |                  |                               |                  |                  |                  |                  |                  |
| Bootstrap Replicates <sup>a</sup>  |                  |                               |                  |                  |                  |                  |                  |
| MMRpro > MMRpro+                   | 0                | 0.971                         | 0.174            | 0.010            | 0                | 0                | 0                |
| MMRpro > PREMM <sub>5</sub>        | 0.876            | 1                             | 0.002            | 0.998            | 0.806            | 0.474            | 0.995            |
| MMRpro > Leiden                    | 1                | 1                             | 1                | 1                | 0.968            | 0.583            | 0.985            |
| MMRpro > MMRpredict                | 0.966            | 1                             | 1                | 1                | 0                | 0                | 0.991            |
| MMRpro+ > PREMM <sub>5</sub>       | 1                | 1                             | 0.038            | 1                | 1                | 0.994            | 1                |
| MMRpro+ > Leiden                   | 1                | 1                             | 1                | 1                | 1                | 0.981            | 1                |
| MMRpro+ > MMRpredict               | 1                | 1                             | 1                | 1                | 0.086            | 0.141            | 1                |
| PREMM <sub>5</sub> > Leiden        | 1                | 0                             | 1                | 1                | 0.912            | 0.644            | 0.390            |
| PREMM <sub>5</sub> > MMRpredict    | 0.844            | 0                             | 1                | 1                | 0                | 0                | 0.410            |
| Leiden > MMRpredict                | 0.001            | 0                             | 1                | 1                | 0                | 0.002            | 0.451            |
| Unaffected counselees (N=554)      |                  |                               |                  |                  |                  |                  |                  |
| Model Performance                  |                  |                               |                  |                  |                  |                  |                  |
| Leiden                             | 0.69 (0.63,0.74) | 1.22 (1.06,1.38)              | 0.34 (0.3,0.39)  | 0.34 (0.3,0.39)  | 0.83 (0.78,0.87) | 0.85 (0.81,0.9)  | 0.22 (0.19,0.24) |
| MMRpro                             | 0.69 (0.63,0.74) | 1.69 (1.49,1.94)              | 0.41 (0.36,0.47) | 0.38 (0.33,0.44) | 0.83 (0.78,0.87) | 0.83 (0.78,0.87) | 0.21 (0.18,0.23) |
| MMRpro+                            | 0.71 (0.66,0.76) | 1.65 (1.46,1.91)              | 0.42 (0.37,0.49) | 0.39 (0.34,0.45) | 0.83 (0.79,0.87) | 0.83 (0.79,0.87) | 0.2 (0.17,0.22)  |
| PREMM <sub>5</sub>                 | 0.67 (0.62,0.71) | 3.77 (3.21,4.4)               | 0.43 (0.36,0.49) | 0.39 (0.33,0.45) | 0.78 (0.74,0.82) | 0.81 (0.77,0.86) | 0.24 (0.21,0.27) |
| Improvement Frequency Across       |                  |                               |                  |                  |                  |                  |                  |
| Bootstrap Replicates <sup>a</sup>  |                  |                               |                  |                  |                  |                  |                  |
| MMRpro > MMRpro+                   | 0.223            | 0.736                         | 0.046            | 0.112            | 0.764            | 0.832            | 0.236            |
| MMRpro > PREMM <sub>5</sub>        | 0.985            | 1                             | 0.196            | 0.203            | 0.998            | 0.866            | 1                |
| MMRpro > Leiden                    | 0.743            | 0                             | 0.978            | 0.899            | 0.673            | 0.173            | 0.806            |
| MMRpro+ > PREMM <sub>5</sub>       | 0.987            | 1                             | 0.385            | 0.355            | 0.998            | 0.752            | 1                |
| MMRpro+ > Leiden                   | 0.801            | 0                             | 0.998            | 0.952            | 0.586            | 0.095            | 0.878            |
| PREMM <sub>5</sub> > Leiden        | 0.162            | 0                             | 0.988            | 0.968            | 0.015            | 0.043            | 0.002            |

Table S3. Combined c-statistic, observed to expected ratio, and positive and negative predictive value results across centers, with 95% bootstrap confidence intervals for the additional analysis

†PPV: Proportion of individuals with a probability or score above 5% who have a pathogenic homozygous or heterozygous LS variant; NPV: Proportion of individuals with a probability or score below 5% who do not have a pathogenic homozygous or heterozygous LS variant

#PPV: Proportion of individuals with a probability or score above 2.5% who have a pathogenic homozygous or heterozygous LS variant; NPV: Proportion of individuals with a probability or score below 2.5% who do not have a pathogenic homozygous or heterozygous LS variant

§Includes all counselees who had germline testing.

<sup>a</sup>Improvement is defined as follows: higher c-statistic, O/E ratio closer to 1, higher PPV, higher NPV, and lower Brier score.

|                                          | C-Statistic      | Observed to<br>Expected Ratio | PPV †            | PPV ‡            | NPV †            | NPV ‡            | Brier Score      |
|------------------------------------------|------------------|-------------------------------|------------------|------------------|------------------|------------------|------------------|
| <b>All counselees (N = 784) §</b>        |                  |                               |                  |                  |                  |                  |                  |
| Model Performance                        |                  |                               |                  |                  |                  |                  |                  |
| MMRpro (v2.1-5)                          | 0.79 (0.75,0.82) | 0.93 (0.84,1.03)              | 0.42 (0.37,0.46) | 0.38 (0.34,0.42) | 0.89 (0.85,0.92) | 0.89 (0.85,0.93) | 0.18 (0.16,0.2)  |
| MMRpro+ (v2.1-5)                         | 0.81 (0.77,0.84) | 0.96 (0.88,1.06)              | 0.45 (0.41,0.5)  | 0.41 (0.37,0.46) | 0.9 (0.87,0.93)  | 0.91 (0.87,0.94) | 0.17 (0.15,0.19) |
| MMRpro (v2.1-6)                          | 0.78 (0.74,0.82) | 0.95 (0.86,1.04)              | 0.42 (0.38,0.47) | 0.39 (0.34,0.43) | 0.87 (0.84,0.91) | 0.88 (0.84,0.91) | 0.18 (0.16,0.21) |
| MMRpro+ (v2.1-6)                         | 0.80 (0.77,0.84) | 0.98 (0.89,1.08)              | 0.46 (0.41,0.51) | 0.42 (0.38,0.46) | 0.88 (0.85,0.91) | 0.88 (0.85,0.92) | 0.17 (0.15,0.19) |
| Improvement Frequency Across             |                  |                               |                  |                  |                  |                  |                  |
| Bootstrap Replicates <sup>a</sup>        |                  |                               |                  |                  |                  |                  |                  |
| MMRpro(v2.1-6) > MMRpro(v2.1-5)          | 0.319            | 0.465                         | 1                | 1                | 1                | 1                | 1                |
| MMRpro (v2.1-6) > MMRpro+ (v2.1-5)       | 0.098            | 0.440                         | 1                | 1                | 1                | 1                | 1                |
| MMRpro+ (v2.1-6) > MMRpro (v2.1-5)       | 0.622            | 0.645                         | 1                | 1                | 1                | 1                | 1                |
| MMRpro+ (v2.1-6) > MMRpro+ (v2.1-5)      | 0.346            | 0.605                         | 1                | 1                | 1                | 1                | 1                |
| MMRpro (v2.1-5) > MMRpro+ (v2.1-5)       | 0.004            | 0.456                         | 0.912            | 0.754            | 0.984            | 0.940            | 0.353            |
| <b>CRC Affected counselees (N = 413)</b> |                  |                               |                  |                  |                  |                  |                  |
| Model Performance                        |                  |                               |                  |                  |                  |                  |                  |
| MMRpro (v2.1-5)                          | 0.78 (0.73,0.82) | 0.86 (0.77,0.96)              | 0.47 (0.42,0.53) | 0.44 (0.39,0.49) | 0.82 (0.74,0.89) | 0.82 (0.71,0.9)  | 0.22 (0.19,0.25) |
| MMRpro+ (v2.1-5)                         | 0.81 (0.77,0.85) | 0.90 (0.8,0.99)               | 0.52 (0.46,0.58) | 0.5 (0.44,0.55)  | 0.88 (0.82,0.93) | 0.92 (0.86,0.97) | 0.20 (0.16,0.23) |
| MMRpro (v2.1-6)                          | 0.77 (0.72,0.82) | 0.88 (0.78,0.98)              | 0.49 (0.43,0.55) | 0.45 (0.4,0.51)  | 0.79 (0.72,0.86) | 0.79 (0.7,0.87)  | 0.23 (0.19,0.26) |
| MMRpro+ (v2.1-6)                         | 0.81 (0.77,0.85) | 0.92 (0.82,1.02)              | 0.55 (0.48,0.61) | 0.51 (0.45,0.57) | 0.85 (0.79,0.9)  | 0.86 (0.79,0.92) | 0.20 (0.17,0.24) |
| Improvement Frequency Across             |                  |                               |                  |                  |                  |                  |                  |
| Bootstrap Replicates <sup>a</sup>        |                  |                               |                  |                  |                  |                  |                  |
| MMRpro(v2.1-6) > MMRpro(v2.1-5)          | 0.398            | 0.472                         | 1                | 1                | 1                | 0.991            | 1                |
| MMRpro (v2.1-6) > MMRpro+ (v2.1-5)       | 0.103            | 0.327                         | 1                | 0.999            | 1                | 0.999            | 1                |
| MMRpro+ (v2.1-6) > MMRpro (v2.1-5)       | 0.806            | 0.634                         | 1                | 1                | 1                | 1                | 1                |
| MMRpro+ (v2.1-6) > MMRpro+ (v2.1-5)      | 0.421            | 0.485                         | 1                | 1                | 1                | 1                | 1                |
| MMRpro (v2.1-5) > MMRpro+ (v2.1-5)       | 0.001            | 0.286                         | 0.579            | 0.616            | 0.558            | 0.686            | 0.274            |
| <b>Unaffected counselees (N=371)</b>     |                  |                               |                  |                  |                  |                  |                  |
| Model Performance                        |                  |                               |                  |                  |                  |                  |                  |
| MMRpro (v2.1-5)                          | 0.75 (0.68,0.82) | 1.18 (0.94,1.46)              | 0.27 (0.21,0.34) | 0.27 (0.21,0.34) | 0.92 (0.88,0.96) | 0.92 (0.88,0.96) | 0.14 (0.11,0.16) |
| MMRpro+ (v2.1-5)                         | 0.74 (0.67,0.81) | 1.19 (0.94,1.45)              | 0.26 (0.2,0.33)  | 0.26 (0.2,0.33)  | 0.90 (0.86,0.94) | 0.90 (0.86,0.94) | 0.13 (0.11,0.16) |
| MMRpro (v2.1-6)                          | 0.75 (0.68,0.82) | 1.18 (0.95,1.46)              | 0.31 (0.24,0.39) | 0.28 (0.21,0.34) | 0.92 (0.88,0.96) | 0.92 (0.88,0.96) | 0.13 (0.11,0.16) |
| MMRpro+ (v2.1-6)                         | 0.74 (0.66,0.81) | 1.20 (0.95,1.47)              | 0.31 (0.24,0.39) | 0.27 (0.2,0.34)  | 0.91 (0.87,0.94) | 0.90 (0.86,0.94) | 0.13 (0.11,0.16) |
| Improvement Frequency Across             |                  |                               |                  |                  |                  |                  |                  |
| Bootstrap Replicates <sup>a</sup>        |                  |                               |                  |                  |                  |                  |                  |
| MMRpro(v2.1-6) > MMRpro(v2.1-5)          | 0.404            | 0.465                         | 1                | 0.997            | 0.996            | 0.994            | 0.999            |
| MMRpro (v2.1-6) > MMRpro+ (v2.1-5)       | 0.550            | 0.530                         | 0.999            | 0.999            | 0.998            | 1                | 0.999            |
| MMRpro+ (v2.1-6) > MMRpro (v2.1-5)       | 0.284            | 0.423                         | 0.997            | 0.989            | 0.989            | 0.971            | 0.999            |
| MMRpro+ (v2.1-6) > MMRpro+ (v2.1-5)      | 0.403            | 0.477                         | 0.997            | 0.995            | 0.996            | 0.991            | 0.998            |
| MMRpro (v2.1-5) > MMRpro+ (v2.1-5)       | 0.887            | 0.643                         | 0.759            | 0.865            | 0.852            | 0.907            | 0.847            |

Table S4. Combined c-statistic, observed to expected ratio, and positive and negative predictive value results across centers, with 95% bootstrap confidence intervals comparing the MMRpro version 2.1-5 to the MMRpro version 2.1-6.

†PPV: Proportion of individuals with a probability or score above 5% who have a pathogenic homozygous or heterozygous LS variant; NPV: Proportion of individuals with a probability or score below 5% who do not have a pathogenic homozygous or heterozygous LS variant

‡PPV: Proportion of individuals with a probability or score above 2.5% who have a pathogenic homozygous or heterozygous LS variant; NPV: Proportion of individuals with a probability or score below 2.5% who do not have a pathogenic homozygous or heterozygous LS variant

§Includes all counselees who had germline testing.

<sup>a</sup>Improvement frequency is defined as the proportion of replicates for which model 1 had a higher c-statistic than model 2 across 1000 bootstrap replicates.

| Model              | NRI (MMRpro+)        | NRI (PREMM <sub>5</sub> ) | Log loss          |
|--------------------|----------------------|---------------------------|-------------------|
| MMRpro+            |                      |                           | 0.67 (0.55, 0.82) |
| PREMM <sub>5</sub> |                      |                           | 0.52 (0.46, 0.58) |
| LR                 | -0.99 (-1.14, -0.84) | -0.21 (-0.42, -0.05)      | 0.42 (0.39, 0.45) |
| Spline             | -0.84 (-1.00, -0.65) | 0.21 (-0.18, 0.70)        | 0.47 (0.41, 0.56) |
| RF                 | -0.69 (-0.92, -0.47) | 0.13 (-0.16, 0.34)        | 0.79 (0.51, 1.22) |

Table S5. Net reclassification indices and log loss values for MMRpro+, PREMM<sub>5</sub>, and several model combination techniques combining MMRpro+ and PREMM<sub>5</sub> on the data. All metrics are obtained through Monte Carlo cross-validation, with 100 iterations splitting the data into half for training and half for testing. LR refers to logistic regression, Spline refers to generalized additive model with multivariate smoothing splines, and RF refers to random forest. NRI (MMRpro+) refers to the net reclassification index when comparing to MMRpro+, and NRI (PREMM) refers to the net reclassification index when comparing to PREMM<sub>5</sub>.

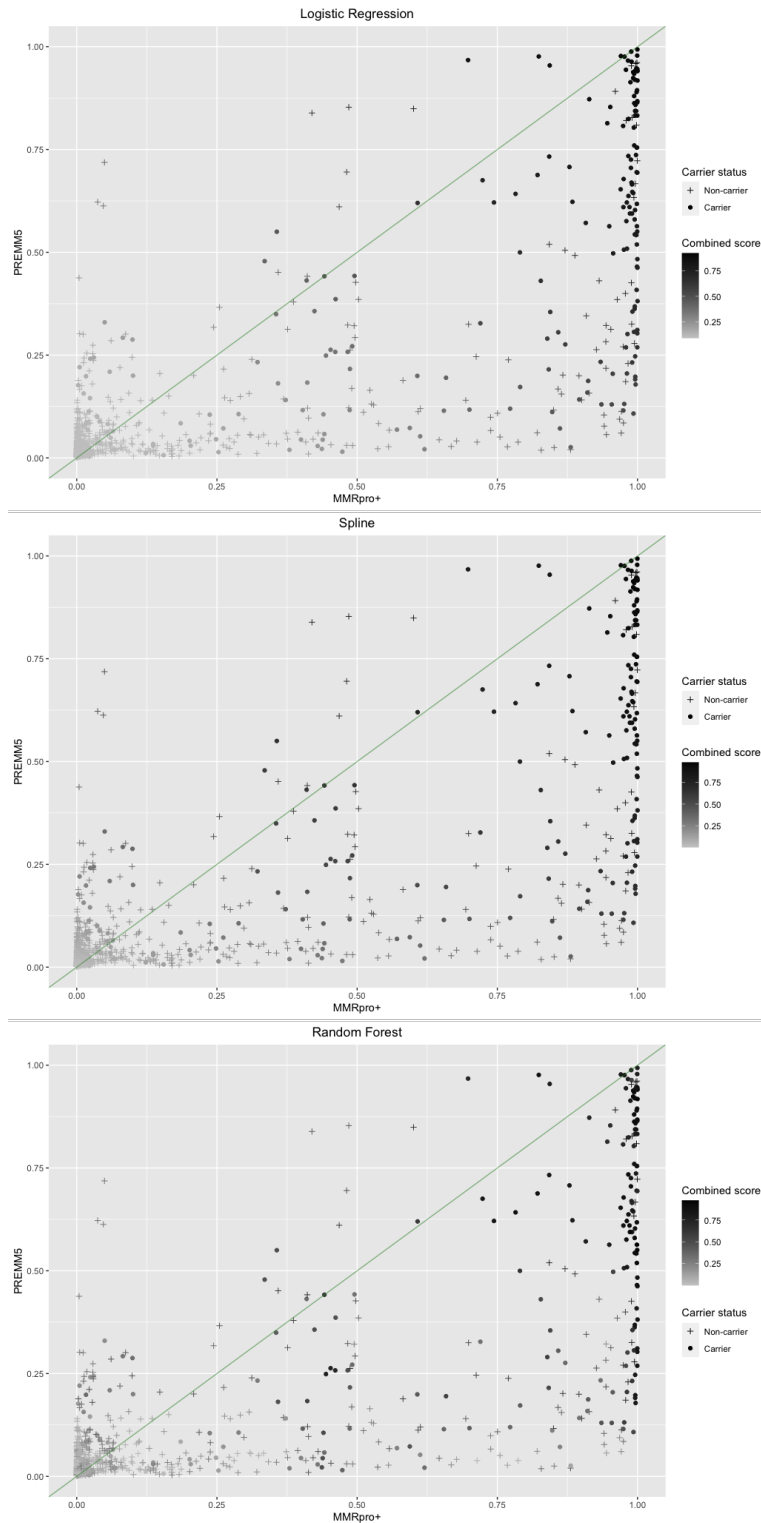

Figure S1. Plots comparing the MMRpro+ and PREMM<sub>5</sub> score. The dots represent individuals with a pathogenic homozygous or heterozygous LS variant, and the pluses represent individuals without a pathogenic homozygous or heterozygous LS variant. The points are shaded based on the scores for the combined models (logistic regression,



generalized additive models with multivariate smoothing splines, and random forests).
